# Supplementary material for: The effect of community dialogues and sensitization on patient reporting of adverse events in rural Uganda: Uncontrolled before-after study
Source: PubMed Central journal article supplement (PMC6508596; doi:10.1371/journal.pone.0203721), 2019-05-09
Supplement: pone.0203721.s001.pdf [file pone.0203721.s001.pdf]

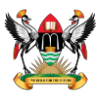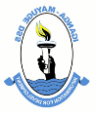

**MAKERERE UNIVERSITY Center for Health & Population Research (MUCHAP) Iganga/Mayuge HDSS**  
**KAP STUDY ON ADVERSE DRUG REACTIONS**  
 RESPONDENT SHOULD BE ADULT (18 YRS +) USUAL RESIDENT OF THE HOUSEHOLD

IDENTIFICATION

|                       |                                                                                                                                                                                                                                                                                                                                                                                           |                                                                                                                                                                                                                                                                                                                                                                                           |                                                                                                                                                                                              |
|-----------------------|-------------------------------------------------------------------------------------------------------------------------------------------------------------------------------------------------------------------------------------------------------------------------------------------------------------------------------------------------------------------------------------------|-------------------------------------------------------------------------------------------------------------------------------------------------------------------------------------------------------------------------------------------------------------------------------------------------------------------------------------------------------------------------------------------|----------------------------------------------------------------------------------------------------------------------------------------------------------------------------------------------|
| FA CODE               | <input type="text"/> <input type="text"/> <input type="text"/>                                                                                                                                                                                                                                                                                                                            | INTERVIEW DATE                                                                                                                                                                                                                                                                                                                                                                            | <input type="text"/> |
| DISTRICT              | .....                                                                                                                                                                                                                                                                                                                                                                                     |                                                                                                                                                                                                                                                                                                                                                                                           |                                                                                                                                                                                              |
| VILLAGE NAME AND CODE | ..... <input type="text"/> <input type="text"/> <input type="text"/> <input type="text"/> <input type="text"/> <input type="text"/>                                                                                                                                                                                                                                                       |                                                                                                                                                                                                                                                                                                                                                                                           |                                                                                                                                                                                              |
| LOCATION ID           | <input type="text"/>                                           |                                                                                                                                                                                                                                                                                                                                                                                           |                                                                                                                                                                                              |
| RESPONDENT NAME       | ..... RESPID:                                                                                                                                                                                                                                                                                                                                                                             | <input type="text"/> |                                                                                                                                                                                              |
| HOUSEHOLD HEAD NAME   | .....                                                                                                                                                                                                                                                                                                                                                                                     |                                                                                                                                                                                                                                                                                                                                                                                           |                                                                                                                                                                                              |
| HOUSEHOLD HEAD ID     | <input type="text"/> |                                                                                                                                                                                                                                                                                                                                                                                           |                                                                                                                                                                                              |

**Status of Visits by Interviewers:**

**\*Result Codes**

- 01 Completed
- 02 Respondent not at home at the time of visit
- 03 Respondent absent for extended period of time
- 04 Postponed

05 Refused

06 Others \_\_\_\_\_  
(Specify)

|                   |                                                       |                                                                                                                                                                                                                               |
|-------------------|-------------------------------------------------------|-------------------------------------------------------------------------------------------------------------------------------------------------------------------------------------------------------------------------------|
| <b>Editor</b>     | <b>Code</b> <input type="text"/> <input type="text"/> | <b>Date</b> <input type="text"/> |
| <b>Supervisor</b> | <b>Code</b> <input type="text"/> <input type="text"/> | <b>Date</b> <input type="text"/> |
| <b>Data Entry</b> | <b>Code</b> <input type="text"/> <input type="text"/> | <b>Date</b> <input type="text"/> |

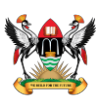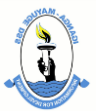

| QUESTIONS AND FILTERS                                                                                                                                                          | CODING CATEGORIES                                                                                                                                                                                                                                                                                                                 | SKIP |
|--------------------------------------------------------------------------------------------------------------------------------------------------------------------------------|-----------------------------------------------------------------------------------------------------------------------------------------------------------------------------------------------------------------------------------------------------------------------------------------------------------------------------------|------|
| 1. Wazalibwa mwaka ki, mwezi ki era lunaku ki?<br><i>In what year, month and Day were you born?</i><br><br>IF MONTH NOT KNOWN RECORD 99 & ALSO, IF YEAR IS NOT KNOWN RECORD 99 | Years <input type="text"/> <input type="text"/> <input type="text"/> <input type="text"/><br><br>Months <input type="text"/> <input type="text"/><br><br>Day <input type="text"/> <input type="text"/>                                                                                                                            |      |
| 2. Wali nemyaka emeka ku mazalibwa go agasemba yo?<br><i>How old were you on your last birthday?</i><br><br>COMPARE & RECONCILE Q1 AND Q2 IF NOT CONSISTENT                    | Age <input type="text"/> <input type="text"/>                                                                                                                                                                                                                                                                                     |      |
| 3. Wasomaku?<br><i>Have you ever attended school?</i>                                                                                                                          | Yes                            1<br>No                                2                                                                                                                                                                                                                                                           | →5   |
| 4. Kibiina ki ekyawaigulu kyewamaliliza?<br><i>What is the highest grade you completed?</i>                                                                                    | 1 – Primary<br>2 – Secondary            Class <input type="text"/> <input type="text"/><br>3 – Tertiary<br>4 – University                                                                                                                                                                                                         |      |
| 5. Obaire oviira mu maka gaano bulidho?<br><i>Are you a usual resident of this household?</i>                                                                                  | Yes                            1<br>No                                2(End)                                                                                                                                                                                                                                                      |      |
| 6. Oli mufumbo?<br><i>Are you currently married?</i>                                                                                                                           | Yes                            1<br>No                                2                                                                                                                                                                                                                                                           |      |
| 7. Oliwa eidhini ki?<br><i>What is your religion?</i>                                                                                                                          | Christian(Anglican).....1<br>Christian (Roman catholic)..... 2<br>Christian (Pentecostal)..... 3<br>Muslim.....4<br>Other (specify).....5                                                                                                                                                                                         |      |
| 8. Omukulu wa maka gaano akweta atya?<br><i>What is your relationship with the Head of Household?</i>                                                                          | Head of Household.....01<br>Spouse.....02<br>Son/Daughter.....03<br>Step child.....04<br>Adopted/Foster child.....05<br>Son in law/Daughter.....06<br>Parent.....07<br>Step-Parent.....08<br>Parent-in-law.....09<br>Brother/sister.....10<br>Brother-in-law/Sister-in-law.....11<br>No relation.....12<br>Other (specify).....13 |      |



9. Okola mulimo ki omukulu? (Omulimo ogusinga okutwala ebiseera byo buli lunaku)  
 What is your **main** occupation (ie. Activity that regularly takes most of your day time) **PLEASE CIRCLE ONLY ONE RESPONSE**

|                                            |    |
|--------------------------------------------|----|
| None.....                                  | 1  |
| Public sector employee (Professional)..... | 2  |
| Public sector employee (Manual).....       | 3  |
| Private sector employee (Professional)...  | 4  |
| Private sector employee (Manual) .....     | 5  |
| Self-employed (business).....              | 6  |
| Self-employed (Agric/fishery) .....        | 7  |
| Domestic work in Household.....            | 8  |
| Teacher.....                               | 9  |
| Student.....                               | 10 |
| Job-less.....                              | 11 |
| Incapacitated.....                         | 12 |
| Other(specify).....                        | 13 |

**SECTION 2: OBULWAIRE OBUMANHIKWA MU MAKWA  
 COMMON ILLNESSES IN THE HOUSEHOLD**

10. Buti, nandyenze okukubuzaku ku'ndwaire eghe oba abantu bo mumaka gaano dhebaalwalaku mu myezi esatu egibise n'obwiidandhabi bwemwafunaku okudidandhaba. Nkusaba onkobereku amainha ag'omuntu, emyaka, obulwaire n'obwiidandhabi obwa mughebwa.  
 Now, I would like to ask you about the illnesses that you or members of your household have experienced in the last 3 months and the treatment you received to manage them. I request you to tell me the name of the person, age, illness and drugs/treatment taken.

| Name  | AGE | ILLNESS | TREATMENT TAKEN |
|-------|-----|---------|-----------------|
| i).   |     |         |                 |
| ii).  |     |         |                 |
| iii). |     |         |                 |
| iv).  |     |         |                 |
| v)..  |     |         |                 |
| vi).  |     |         |                 |

11a. Ighe oba abantu b'omumaka gaano mufunawa obwiidandhabi bwemukozesa?  
 Where do you or members of your household usually get the treatment you use from? (CIRCLE ALL APPLICABLE)

|                          |    |
|--------------------------|----|
| Drug shop .....          | 1  |
| VHT.....                 | 2  |
| Private clinic .....     | 3  |
| Government HC.....       | 4  |
| Hospital.....            | 5  |
| Relative/Neighbour ..... | 6  |
| Other patients.....      | 7  |
| Herbalist .....          | 8  |
| Friends.....             | 9  |
| Other shops/Market ..... | 10 |
| Bus.....                 | 11 |
| Other, Specify.....      | 12 |

11b. Abasawo bakuwaku amawulire gaano wamanga agagema kubulezi nga ogiire okufunha obwiidandhabi?  
 Do health care providers give you the following information about the medicines when you seek treatment

|                |        |       |        |
|----------------|--------|-------|--------|
| Drug name....  | 1. Yes | 2. No | 3. DKN |
| What it treats | 1. Yes | 2. No | 3. DKN |
| How to take it | 1. Yes | 2. No | 3. DKN |

**SECTION 3: AMAWULIRE AGAGEMA KU BULEZI, OBUZIBU N'OKULOOPA  
 KNOWLEDGE ABOUT DRUGS, SIDE EFFECTS AND REPORTING**

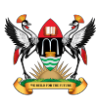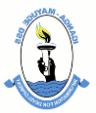

|                                                                                                                                                                                                                                                                                                                                                                                                                                  |                                                                                                                                                                                                                                                                   |  |
|----------------------------------------------------------------------------------------------------------------------------------------------------------------------------------------------------------------------------------------------------------------------------------------------------------------------------------------------------------------------------------------------------------------------------------|-------------------------------------------------------------------------------------------------------------------------------------------------------------------------------------------------------------------------------------------------------------------|--|
| <p>12. Obaire okiidhi nti mukwongereza kukwiidandhaba obulwaire oba endwaire, obulezi bwonabwona busobola okuleeta obuzibu ku muntu abukozezyisa?</p> <p>Are you aware that in addition to treating illness/diseases, any medicine has potential to cause negative effect to person taking it?</p>                                                                                                                               | <p>Yes ..... 1<br/>         No ..... 2<br/>         Don't know ..... 3</p>                                                                                                                                                                                        |  |
| <p>13. Mu myezi esatu egibise, wawulilaku obubaka bwonabwona obugemagana nobulabe oba obuzibu obulezi bwebusobola okututuusaku nengeri y'okuloopa obuzibu obwo?</p> <p>In last 3 months, have you heard any information about the possible negative effects of the medicines/drugs that we take and how to report these effects?</p>                                                                                             | <p>Yes .....<br/>         No .....</p>                                                                                                                                                                                                                            |  |
| <p>14. Wawulirawa obubaka obugemagana kubulabe obuwa ku bulezi mu myezi 3 egibise?</p> <p>Where did you hear information about the drug /medicine effects in last 3 months?</p> <p><b>(MULTIPLE RESPONSE ALLOWED)</b></p>                                                                                                                                                                                                        | <p>Radio..... 1<br/>         Health worker told me..... 2<br/>         Discussion at Health facility..... 3<br/>         Discussion in the community..... 4<br/>         Poster/publications..... 5<br/>         Other(Specify)..... 6</p>                        |  |
| <p>15. Okukubagania ebidhubo nokusomesa abantu munkiiko kubulabe obututusiibwaku okuva ku obulezi n'okuloopa obulabe obwo, olowooza nganenkola enayongera mubantu okuloopa obulabe obuwa mubulezi?</p> <p>Do you think conducting community meetings to discuss and sensitize people about possible drug effects and reporting is an effective way to increase reporting of drugs reactions?</p>                                 | <p>Yes .....<br/>         No .....</p>                                                                                                                                                                                                                            |  |
| <p>16. Okukubagania ebidhubo nokusomesa abalwaire mu malwaliro kubulabe obututusiibwaku okuva ku obulezi n'okuloopa obulabe obwo, olowooza nganenkola enayongera mubantu okuloopa obulabe obuwa mubulezi?</p> <p>Do you think conducting health facility meetings with patients to discuss and sensitize them about possible drug effects and reporting is an effective way to increase reporting of adverse drug reactions?</p> | <p>Yes .....<br/>         No .....</p>                                                                                                                                                                                                                            |  |
| <p>17. Mu ndwoozayo, <b>ngeriki esingirailala obulungi mukwongera</b> okuloopa obulabe obututusiibwaku nga buva kubulezi?</p> <p><b>(DON'T READ OUT OPTIONS)</b></p> <p>In your opinion, what is the <b>most effective</b> way to increase reporting of effects the drugs/medicines that we take in this community?</p>                                                                                                          | <p>Radio.....1<br/>         Health education by health worker ... 2<br/>         Discussion at Health facility.....3<br/>         Discussion in community meetings... 4<br/>         Education by religious leaders ..... 5<br/>         Other, specify.....6</p> |  |
| <p>18. Wa ensonga lwaki olowooza nga nesinga?</p> <p>Give reasons why you think it's the best way?</p>                                                                                                                                                                                                                                                                                                                           | <p>.....<br/>         .....<br/>         .....</p>                                                                                                                                                                                                                |  |
| <p>19. Ngeliki edhindi dholowoza nga nedhandi kozeseibwa mu kumanisa abantu kubulabe obuwa kubulezi nho kuloopa?</p> <p>Which other ways would you suggest to be used in informing community members about ADRs and reporting?</p>                                                                                                                                                                                               | <p>Way 1:.....<br/>         Way 2:.....<br/>         Way 3:.....</p>                                                                                                                                                                                              |  |
| <p>20. Eghe oba omuntu w'omumaka gaano wafunaku obuzibu bwonabwona obuwa ku bulezi?</p> <p>Have you or a member of your household ever experienced any negative effect of the medicines</p>                                                                                                                                                                                                                                      | <p>Yes .....1<br/>         No .....2 <b>(Skip to q22)</b><br/>         Don't know... ..... 3 <b>(Skip to q22)</b></p>                                                                                                                                             |  |



|                                                                                                                                                                                                                                                                                                                                |                                                                                                                                                                                                                                                                                 |             |
|--------------------------------------------------------------------------------------------------------------------------------------------------------------------------------------------------------------------------------------------------------------------------------------------------------------------------------|---------------------------------------------------------------------------------------------------------------------------------------------------------------------------------------------------------------------------------------------------------------------------------|-------------|
| <p>21. Wakolaku ki oba omuntu w'omumaka gaano yakola ki nga afunye obuzibu obwo?<br/>What did you or member of your household do in the event that you/other member experienced that negative effect?</p>                                                                                                                      | <p>Report it back to provider.....1<br/>Treat it myself.....2<br/>Ignored it.....3<br/>I stopped the drug.....4<br/>Don't know.....5</p>                                                                                                                                        |             |
| <p>22. Osobola okunkoberaku nti obulumi bwowulira nga omazze okufunha obwiidandhabi buva oba bwali buva ku bulezi bwewakozesa?<br/>Would you tell if the unwellness or suffering you feel after treatment is/was as a result of the medicine you took?</p>                                                                     | <p>Yes .....1<br/>No.....2<br/>Dont know.....3</p>                                                                                                                                                                                                                              |             |
| <p>23a. Wandilopye?<br/>Would you report such?</p>                                                                                                                                                                                                                                                                             | <p>Yes.....1<br/>No..... 2(SKIP TO Q24)<br/>Don't know..... 3</p>                                                                                                                                                                                                               |             |
| <p>23 b. Waloopa?<br/>Did you report the Adverse Drug Reactions:</p>                                                                                                                                                                                                                                                           | <p>Yes.....1Skip to q25a)<br/>No..... 2<br/>Don't know..... 3</p>                                                                                                                                                                                                               |             |
| <p>24. Oba mbe, lwaki ti waloopa buzibu bunno obw'obulezi?<br/>If No, why wouldn't you report the negative effects of the medicines?</p>                                                                                                                                                                                       | <p>Cannot tell if due to drug or not.....1<br/>Health workers have no time.....2<br/>I fear being victimised.....3<br/>It will disappear shortly.....4<br/>It is not necessary.....5<br/>Other, specify.....6</p>                                                               | Skip to Q26 |
| <p>25a. Okuva ebiseera byewazuura obuzibu, wamala eibanga ki okuloopa obuzibu bunno?<br/>From time of detection of the Adverse reaction, how long did you take to report that adverse Event?</p>                                                                                                                               | <p>.....days or<br/>.....weeks or<br/>..... Months<br/>.....N/A (CHOOSE Appropriately)</p>                                                                                                                                                                                      |             |
| <p>25b. Oba waloopa, kyikyiki ekyakolebwawo?<br/>If you reported what happened?</p>                                                                                                                                                                                                                                            | <p>Counselled about the effect of drug.....1<br/>Retreated.....2<br/>Drug was changed.....3<br/>Told to continue taking the drug.....4<br/>Treatments was discontinued .....5<br/>I was ignored.....6<br/>Clinician was busy treating others.....7<br/>Other, specify.....8</p> | Q27         |
| <p>26. Singa wali wa kuloopa, wandi loopye gha?<br/>If you were to report where would you report it to?</p>                                                                                                                                                                                                                    | <p>To the nearest health facility.....1<br/>Report to where drug was got from.....2<br/>VHT.....3<br/>District Health Office (DHO).....4<br/>Local authorities (S/County health worker &amp; LCs).....5<br/>National Drug Authority (NDA).....6<br/>Other, specify.....7</p>    |             |
| <p>27a. Okusenziira kwiighe, ngeri ki dhobona nga nesinga era nga nungi ku kuloopa embera embi mu maka gaano?<br/>According to you, what method, would you prefer as the <b>best</b> and <b>convenient</b> system for reporting an adverse event in this household?</p>                                                        | <p>.....</p>                                                                                                                                                                                                                                                                    |             |
| <p>27b. Okusenziira kwiighe, ngeri ki kudhino wamanga doboona nga nedisinga era nga nungi ku kuloopa embera embi mu maka gaano?<br/>According to you, which of the following methods, would you prefer as the <b>best</b> and <b>convenient</b> system for reporting an adverse event in this household? (SELECT ONLY ONE)</p> | <p>Phone call to the clinic.....1<br/>Phone call to NDA.....2<br/>Phone call to DHO.....3<br/>SMS.....4<br/>Returning to the drug seller.....5<br/>Report to VHT.....5<br/>Local authority(S/County health worker &amp; LCs).....6<br/>Other, specify.....7</p>                 |             |

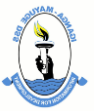

|                                                                                                                                  |                 |  |
|----------------------------------------------------------------------------------------------------------------------------------|-----------------|--|
| 28. Olowooza okuloopa obuzibu obuva mu kukozeza obulezi kyetagisa?<br>Do you think reporting adverse drug reaction is necessary? | Yes.....1       |  |
|                                                                                                                                  | No.....2        |  |
|                                                                                                                                  | Dont know.....3 |  |

**Section 4**

**Mu kitundu kino, nkusaba nti owulilize ku bintu bino byenja okukusomera, era nsaba okunkobera nti yii, mbe oba tiidhi**

*In this section, I request that you listen to the statement I am going to read to you, and please tell me you “Agree”/”YES” or “Disagree”/”No” OR “Don’t-know”(Tick in the appropriate box provided)*

| Bino bili n’okuloopebwa?<br>These should be reported? |                                                                                                                                                                                                                                                          | Yes/Agree | No/Disagree | Don't Know |
|-------------------------------------------------------|----------------------------------------------------------------------------------------------------------------------------------------------------------------------------------------------------------------------------------------------------------|-----------|-------------|------------|
| 1.                                                    | Obuzibu obulowozebwa okuva ku bulezi obutamanikwa<br>Suspected negative effects for which suspected drugs is uncertain                                                                                                                                   |           |             |            |
| 2.                                                    | Obukakafu okuva ku bulezi oba obuzibu<br>Certain/sure reactions or negative effects                                                                                                                                                                      |           |             |            |
| 3.                                                    | Obuzibu obw’amanhi einho nga okuvaku enviiri, nebindhi okuva mubwiidandhabi bwa kokolo<br>Serious reactions e.g. sight loss due to quinine, hair loss from cancer drugs etc                                                                              |           |             |            |
| 4.                                                    | Obuzibu nga butono nga okusesema, okwiidhukana<br>Mild reactions e.g. side effects such as vomiting & diarrhea                                                                                                                                           |           |             |            |
| 5.                                                    | Obuzibu nga obufunye okuva mu bulezi obubaire butundibwa mu butale okuswiika emyaka eikumi<br>Reactions to drugs which have been on sale (in the market) for more than 10 years                                                                          |           |             |            |
| 6.                                                    | Obuzibu okuva ku bulezi obuyaka obufulumizibwa mu butale<br>Reactions to newly introduced drugs in the market                                                                                                                                            |           |             |            |
| 7.                                                    | Obuzibu obumanhikwa obulungi<br>Common or well known reactions                                                                                                                                                                                           |           |             |            |
| 8.                                                    | Obuzibu obutasubirwa oba obutali bwa bulidho<br>Unexpected/Unusual reactions                                                                                                                                                                             |           |             |            |
| 9.                                                    | Okusobola okugemaganhia n’obulezi obundhi<br>Possible interaction with other drugs                                                                                                                                                                       |           |             |            |
| 10.                                                   | Obuzibu obuva mu kukozeza eidhagala lyekinaasi<br>Reactions that may result from taking herbal medicine                                                                                                                                                  |           |             |            |
| 11.                                                   | Obuzibu obuva mu kukozeza eidhagala lyekinaasi ghalala n’obulezi obwekizungu okugeza nga mukiseera kya mabundha, akakowoolo, omusudha n’ebindhi.<br>Reactions from taking herbal and modern medicine together eg. During pregnancy, for cough, fever etc |           |             |            |

**Ndwooza ki dhowa kukuloopa obuzibu bw’ofuna nga omazze okukozeza obulezi era dhandisanile dhiloopebwe dhitya?**

**What are your comments about reporting adverse drug reactions and how they should be reported.**

.....  
 .....  
 .....
