# Supplementary material for: The effect of community dialogues and sensitization on patient reporting of adverse events in rural Uganda: Uncontrolled before-after study
Source: PubMed Central journal article supplement (PMC6508596; doi:10.1371/journal.pone.0203721), 2019-05-09
Supplement: pone.0203721.s002.pdf [file pone.0203721.s002.pdf]

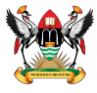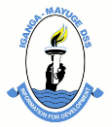

**MAKERERE UNIVERSITY CENTER FOR HEALTH & POPULATION RESEARCH  
(MUCHAP) - Iganga/Mayuge HDSS  
National Pharmacovigilance Centre (NPC), National Drug Authority (NDA)**

**KAP STUDY ON ADVERSE DRUG REACTIONS - PROVIDER QUESTIONNAIRE**

Questionnaire-No.....

FA-Name: .....FA CODE:.....

**Respondent's identification information**

|                      |                                                 |
|----------------------|-------------------------------------------------|
| Date                 | Respondent Surname: .....<br>Other Names: ..... |
| Name of the facility | Age                                             |
| FIN:                 | Gender: 1 =Male 2= Female                       |
| Village              | Parish                                          |
| District             | <b>Cadre/Qualification</b>                      |
|                      | 1. Doctor/Medical officer                       |
|                      | 2. Clinical officer                             |
|                      | 3. Nurse/Midwife                                |
|                      | 4. Nursing Assistant                            |
|                      | 5. Pharmacist                                   |
|                      | 6. Lab technician/ Assistant                    |
|                      | 7. Counsellor                                   |
|                      | 8. Other (Specify)                              |
|                      | <b>Maximum education level attained</b>         |
|                      | 1. Masters                                      |
|                      | 2. Bachelors                                    |
|                      | 3. Diploma                                      |
|                      | 4. Certificate                                  |
|                      | 5. Secondary                                    |
|                      | 6. Primary                                      |
|                      | 7. None                                         |

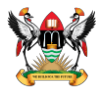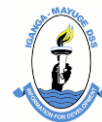

|                                                                           |                                                                                                                                                                                                   |
|---------------------------------------------------------------------------|---------------------------------------------------------------------------------------------------------------------------------------------------------------------------------------------------|
| Eidwaliro lino liri mu eidhala ki?<br>What is the facility classification | Hospital.....1<br>Health Centre IV.....2<br>Health Centre III.....3<br>Health Centre II.....4<br>Private Clinic.....5<br>Drug Shop.....6<br>Pharmacy.....6<br>Shop.....7<br>Other (Specify).....8 |
| Eidwaliro lino litwalibwa anhi?<br>What is the ownership of this facility | Government owned.....1<br>NGO/Faith-based.....2<br>Private.....3                                                                                                                                  |

**Section A**

|                                                                                                                                                                                                |                                                                                                                                                                                                                                                                   |
|------------------------------------------------------------------------------------------------------------------------------------------------------------------------------------------------|-------------------------------------------------------------------------------------------------------------------------------------------------------------------------------------------------------------------------------------------------------------------|
| 1. Olowooza abantu<br>b'omukitundu munno bateera<br>kufunha gha obulezi?<br>Where do you think community<br>members commonly get their<br>medicines from?<br><b>(MULTIPLE ANSWERS ALLOWED)</b> | Drug shop .....1<br>VHT .....2<br>Private clinic .....3<br>Government clinic.....4<br>Relative .....5<br>Other patients .....6<br>Herbalist .....7<br>Friends .....8<br>Internet.....9<br>Market .....10<br>Bus .....11<br>Shops .....12<br>Other, Specify.....13 |
| 2. Obaire okidi nti obulezi<br>bwonabwona busobola okuba<br>n'obuzibu/obulabe ku<br>mulwaire?<br>Are you aware that any medicine may<br>have negative effects on the patient?                  | Yes .....1<br>No.....2<br>Don't know .....3                                                                                                                                                                                                                       |



|                                                                                                                                                                                                                                                                                                                                                                                                   |                                                                                                                                                                                                        |
|---------------------------------------------------------------------------------------------------------------------------------------------------------------------------------------------------------------------------------------------------------------------------------------------------------------------------------------------------------------------------------------------------|--------------------------------------------------------------------------------------------------------------------------------------------------------------------------------------------------------|
| <p>3. Mu myezi esatu egibise, wawulilaku obubaka bwonabwona obugemagana nobulabe oba obuzibu obulezi bwebusobola okututuusaku nengeri y'okuloopa obuzibu obwo?</p> <p>In last 3 months, have you heard any information about the possible negative effects of the medicines/drugs that we take and how to report these effects?</p>                                                               | <p>Yes .....1</p> <p>No.....2</p>                                                                                                                                                                      |
| <p>4. Wawulirawa obubaka obugemagana kubulabe obuva ku bulezi mu myezi 3 egibise?</p> <p>Where did you hear information about the drug /medicine effects in last 3 months?</p> <p><b>(MULTIPLE RESPONSE ALLOWED)</b></p>                                                                                                                                                                          | <p>Radio.....1</p> <p>Health worker told me.....2</p> <p>Discussion at Health facility.....3</p> <p>Discussion in the community.....4</p> <p>Poster/publications.....5</p> <p>Other(Specify).....6</p> |
| <p>5. Okukubagania ebidhubo nokusomesa abantu munkiiko kubulabe obututusiibwaku okuva ku obulezi n'okuloopa obulabe obwo, olowooza nganenkola enayongerera mubantu okuloopa obulabe obuva mubulezi?</p> <p>Do you think conducting community meetings to discuss and sensitize people about possible drug effects and reporting is an effective way to increase reporting of drugs reactions?</p> | <p>Yes .....1</p> <p>No.....2</p>                                                                                                                                                                      |
| <p>6. Okukubagania ebidhubo nokusomesa abalwaire mu malwaliro kubulabe obututusiibwaku okuva ku obulezi n'okuloopa obulabe obwo, olowooza nganenkola enayongerera mubantu okuloopa</p>                                                                                                                                                                                                            | <p>Yes .....1</p> <p>No.....2</p>                                                                                                                                                                      |



|                                                                                                                                                                                                                                                                                                                  |                                                                                                                                                                                                                      |
|------------------------------------------------------------------------------------------------------------------------------------------------------------------------------------------------------------------------------------------------------------------------------------------------------------------|----------------------------------------------------------------------------------------------------------------------------------------------------------------------------------------------------------------------|
| <p>obulabe obuva mubulezi?<br/>Do you think conducting health facility meetings with patients to discuss and sensitize them about possible drug effects and reporting is an effective way to increase reporting of adverse drug reactions?</p>                                                                   |                                                                                                                                                                                                                      |
| <p>7. Mu ndwoozayo, <b>ngeriki esingirailala obulungi mukwongera</b> okuloopa obulabe obututusi bwaku nga buva kubulezi?<br/><b>(DON'T READ OUT OPTIONS)</b><br/>In your opinion, what is the <b>most effective</b> way to increase reporting the effects of drugs/medicines that we take in this community?</p> | <p>Radio.....1<br/>Health education by health worker .....2<br/>Discussion at Health facility.....3<br/>Discussion in community meetings.....4<br/>Education by religious leaders .....5<br/>Other, specify.....</p> |
| <p>8. Wa ensonga lwaki olowooza nga nesinga?<br/>Give reasons why you think it's the best way?</p>                                                                                                                                                                                                               | <p>.....<br/>.....<br/>.....</p>                                                                                                                                                                                     |
| <p>9. Ngeliki edhindi dholowoza nga nedhandi kozeseibwa mu kumanisa abantu kubulabe obuva kubulezi nho kuloopa?<br/>Which other ways would you suggest to be used in informing community members about ADRs and reporting?</p>                                                                                   | <p>Way 1:.....<br/>Way 2:.....<br/>Way 3:.....</p>                                                                                                                                                                   |
| <p>10. Magezi ki g'owa omulwaire okukola singa aba afunye obuzibu?<br/>What would you advise a patient to do in case they experienced a negative effect?<br/><b>(MULTIPLE ANSWERS ALLOWED)</b></p>                                                                                                               | <p>Report it to a health worker.....1<br/>Treat it themselves.....2<br/>Ignore it/do nothing.....3<br/>Stop the medicine.....4<br/>Report to NDA/DHO.....5<br/>Don't know .....6<br/>Other (specify).....7</p>       |
| <p>11. Oba ti kuloopa, lwaki?<br/>If not reporting, why?</p>                                                                                                                                                                                                                                                     | <p>Cannot tell if ADR or not .....1</p>                                                                                                                                                                              |

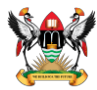

|                                                                                                                                                                                                                                                                                                    |                                                                                                                                                                                                                                                                                                                 |
|----------------------------------------------------------------------------------------------------------------------------------------------------------------------------------------------------------------------------------------------------------------------------------------------------|-----------------------------------------------------------------------------------------------------------------------------------------------------------------------------------------------------------------------------------------------------------------------------------------------------------------|
|                                                                                                                                                                                                                                                                                                    | I have no time .....2<br>The fear of being sued or victimised .....3<br>It will disappear shortly .....4<br>It is not necessary .....5<br>Don't know.....6<br>Other, specify .....7                                                                                                                             |
| 12. Singa obaire wa kuloopa obuzibu obwo obuva ku bulezi, wandibaire oloopa gha?<br>If you are to report the negative drug effect or ADR, where would they/you report it to?                                                                                                                       | District Health Office (DHO).....1<br>District Drug Inspector (DDI) .....2<br>Send to nearest health facility .....3<br>Send to NDA regional office.....4<br>Call the clinic where drug was purchased .....5<br>VHT .....6<br>Local authorities (Sub County health workers & LCs).....7<br>Other, specify.....8 |
| 13a. Okusenziira kwiighe, ngeri ki dhobona nga nesiinga obulungi okuloopa obuzibu obuva ku bulezi; <b>nga buva ku mulwaire okujja eri omwiidandhabi?</b><br>According to you, which method would you prefer as the best system for reporting an adverse event from patient to healthcare provider? | .....                                                                                                                                                                                                                                                                                                           |
| 13b. Okusenziira kwiighe, ngeri ki kudhino wamanga doboona nga nedisinga obulungi okuloopa obuzibu obuva ku bulezi; <b>nga kuva ku mulwaire okujja eri omwiidandhabi?</b><br>According to you, which of the following methods would you prefer as the best system for                              | Phone call to provider.....1<br>SMS.....2<br>Report to the drug seller.....3<br>Report to PV coordinator at hospital .....4<br>Report by email.....5<br>Report using mobile app.....6<br>VHT .....7                                                                                                             |



|                                                                                                                                                                                                                                                          |                                                                                                                                                                                                                                               |
|----------------------------------------------------------------------------------------------------------------------------------------------------------------------------------------------------------------------------------------------------------|-----------------------------------------------------------------------------------------------------------------------------------------------------------------------------------------------------------------------------------------------|
| reporting an adverse effect from patient to healthcare provider?<br><b>(READ OPTIONS ALOUD)</b>                                                                                                                                                          | Local authorities .....8<br>Other, specify .....9                                                                                                                                                                                             |
| 14a Okusenziira kwiighe, ngeri ki dhobona nga nesinga obulungi okuloopa obuzibu obuva ku bulezi <b>nga kuva eri omwiidandhabi oweby'obulamu okutubutuusa waigulu?</b> From healthcare provider onwards                                                   | .....                                                                                                                                                                                                                                         |
| 14b. Okusenziira kwiighe, ngeri ki kudhino wamanga doboona nga nedisinga obulungi okuloopa obuzibu obuva ku bulezi <b>nga kuva eri omwiidandhabi oweby'obulamu okutubutuusa waigulu?</b> From healthcare provider onwards<br><b>(READ OPTIONS ALOUD)</b> | Phone call to NDA.....1<br>SMS to NDA .....2<br>Report to the drug seller.....3<br>Report to PV coordinator at hospital .....4<br>Report by email.....5<br>Report using mobile app.....6<br>Local authorities .....7<br>Other, specify .....8 |
| 15a. Nga omwiidandhabi, waloopaku obuzibu omulwaire wo bweyafuna ng'omaze okumuwa obwiidandhabi?<br>As a provider, have you ever reported an adverse event after treatment?<br>Waloopa gha?<br>Where did you report?                                     | Yes .....1<br>No..... 2 <b>(SKIP to Q17)</b><br>.....                                                                                                                                                                                         |
| 16 Waloopaku mubwangu ki?<br>How soon did you report that Event?                                                                                                                                                                                         | 1 .....days<br>2 ..... weeks<br>3..... months<br>4.....N/A (Choose Appropriate)                                                                                                                                                               |
| 17. Olowooza okuloopa obuzibu                                                                                                                                                                                                                            | Yes .....1                                                                                                                                                                                                                                    |



|                                                                                                                                                  |                                                                                                                                                                                                                                                                                                                                              |
|--------------------------------------------------------------------------------------------------------------------------------------------------|----------------------------------------------------------------------------------------------------------------------------------------------------------------------------------------------------------------------------------------------------------------------------------------------------------------------------------------------|
| obuva ku bulezi nga kyetagisa?<br>Do you think reporting adverse drug reaction is necessary?                                                     | No.....2                                                                                                                                                                                                                                                                                                                                     |
| 18. Omwiidandhaba weby'obulamu asobola okuloopa obuzibu obuva ku bulezi mukitundu kino?<br>Can healthcare provider report ADR in this community? | Yes .....1<br>No.....2                                                                                                                                                                                                                                                                                                                       |
| 19. Omulwaire asobola okuloopa obuzibu obuva ku bulezi mukitundu kino?<br>Can a patient report ADR in this community?                            | Yes .....1<br>No.....2                                                                                                                                                                                                                                                                                                                       |
| 20. Ofunaku amawulire ku bulezi n'obuzibu obuva mu bulezi bulidho?<br>Do you obtain information on medicines and their effects regularly?        | Yes .....1<br>No.....2(Skip to Q22)                                                                                                                                                                                                                                                                                                          |
| 21. Okuva gha?<br>From what source?                                                                                                              | Online- internet .....1<br>National Drug Authority and other government agencies.....2<br>Non Governmental Organisations (NGOs).....3<br>Friends and relatives.....4<br>Leaflets in medicine package .....5<br>Radio announcements.....6<br>Newspapers .....5<br>Advertisements.....6<br>Markets.....7<br>Clinicians and drug sellers .....8 |



|                                   |    |
|-----------------------------------|----|
| Posters at health facilities..... | 9  |
| Other, specify .....              | 10 |

## Section B

*Buti ndhikusaba okwiiramu nti yii, mbe oba tiidhiku bibuuzo bino;*

*Now I would like to request you to respond either **Yes, No or Don't know** to the following questions.*

*Bintu ki kubiino by'olwooza nti bili n'okuloopebwa?*

*Which of these do you think should be reported? (**Tick** in the box provided)*

| <i>Bintu ki kubiino by'olwooza nti bili n'okuloopebwa?<br/>Which of these do you think should be reported?</i>                                                                                                                                                                                                                                                                                                                                                                                                                                                                                                                                                                                           | <i>Yes=1</i> | <i>No=2</i> | <i>Don't Know=99</i> |
|----------------------------------------------------------------------------------------------------------------------------------------------------------------------------------------------------------------------------------------------------------------------------------------------------------------------------------------------------------------------------------------------------------------------------------------------------------------------------------------------------------------------------------------------------------------------------------------------------------------------------------------------------------------------------------------------------------|--------------|-------------|----------------------|
| 22. Obuzibu obulowozebwa okuva ku bulezi obutamanikwa<br>Suspected effect (for which suspected drugs is uncertain)                                                                                                                                                                                                                                                                                                                                                                                                                                                                                                                                                                                       |              |             |                      |
| 23. Obuzibu okuva ku bulezi obumanikwa/obukakasibwa<br>Effects or reactions that are Certain/sure                                                                                                                                                                                                                                                                                                                                                                                                                                                                                                                                                                                                        |              |             |                      |
| 24. Obuzibu obw'amanhi einho nga buyinza okuviraaku okufa,<br>okwegharikiriza obulamu, bwetagisa okugha omulwaire ekitanda<br>oba buleteera okuba mu eidwaliro okumala eibanga eiwavu,<br>ekiviraaku okweyongera obutesobola, kyaleteera okuzaala omwana<br>ali n'obukosefu, oba kyetagisa okuyambibwa okutangira obukosefu<br>obutali bwankalalira<br><br>Serious reactions e.g. ( <b>Results in death, life-threatening, requires<br/>inpatient hospitalization or causes prolongation of existing hospitalization, results<br/>in persistent or significant disability/incapacity, is a congenital anomaly/birth<br/>defect, or requires intervention to prevent permanent impairment or damage</b> ) |              |             |                      |
| 25. Obuzibu nga butono okuva ku bulezi okugeza nga omutwe<br>okulumilira, okusesema n'okwiidhukana<br><br>Mild reactions e.g. side effects such as headache, vomiting & diarrhoea                                                                                                                                                                                                                                                                                                                                                                                                                                                                                                                        |              |             |                      |
| 26. Obuzibu nga obufunye okuva mu bulezi obubaire butundibwa mu<br>butale okuswiika emyaka eikumi<br><br>Reactions to drugs which have been on sale (in the market) for more than<br>10 years                                                                                                                                                                                                                                                                                                                                                                                                                                                                                                            |              |             |                      |
| 27. Obuzibu okuva ku bulezi obuyaka obufulumizibwa mu butale<br><br>Reactions to newly introduced drugs in the market                                                                                                                                                                                                                                                                                                                                                                                                                                                                                                                                                                                    |              |             |                      |



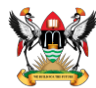

|     |                                                                                   |  |  |  |
|-----|-----------------------------------------------------------------------------------|--|--|--|
| 28. | Obuzibu obumanhikwa obulungi<br>Common or well known reactions                    |  |  |  |
| 29. | Obuzibu obutasubirwa oba obutali bwa bulidho<br>Unexpected/Unusual reactions      |  |  |  |
| 30. | Okusobola okugemagania n'obulezi obundhi<br>Possible interaction with other drugs |  |  |  |

### Section C

|                                                                                                                                                                                                                                                                                                                                                                                 |                                                                                                                                                                 | Yes=1 | No=2 | Don't Know=99 |
|---------------------------------------------------------------------------------------------------------------------------------------------------------------------------------------------------------------------------------------------------------------------------------------------------------------------------------------------------------------------------------|-----------------------------------------------------------------------------------------------------------------------------------------------------------------|-------|------|---------------|
| <p><i>Buti ndhikusaba okwiiramu nti yii, mbe oba tiidhi ku nsonga dhenja okusomera edhiyinza okukulemesa okuloopa obuzibu obulowoozebwa okuva mu kukozeza obulezi</i></p> <p><i>Now I request you to respond YES, No or DK to each of the factors im going to read to you that may discourage you from reporting a suspected Adverse Drug Reaction or negative effects.</i></p> |                                                                                                                                                                 |       |      |               |
| 31.                                                                                                                                                                                                                                                                                                                                                                             | Nali tiidhi nti obuzibu obuva mu kukozeza obulezi buli n'okuloopebwa<br>I didn't know ADRs should be reported                                                   |       |      |               |
| 32.                                                                                                                                                                                                                                                                                                                                                                             | Tyekakasa kyika kya buzibu obw'okuloopebwa<br>I am not sure of the type of reactions to be reported                                                             |       |      |               |
| 33.                                                                                                                                                                                                                                                                                                                                                                             | Obutamanhisibwa bikka eby'okuloopa<br>Lack of knowledge of the forms for reporting                                                                              |       |      |               |
| 34.                                                                                                                                                                                                                                                                                                                                                                             | Empapula nzibu dakwiidhuza<br>Complex to fill the forms                                                                                                         |       |      |               |
| 35.                                                                                                                                                                                                                                                                                                                                                                             | Obutekakasa kubuzibu obuva ku bulezi obumilibwa<br>Uncertainty about reaction being due to drugs ingested                                                       |       |      |               |
| 36.                                                                                                                                                                                                                                                                                                                                                                             | Okutya okuvunhanizibwa mu mbuga dha mateeka<br>Fear of a consequent law suit                                                                                    |       |      |               |
| 37.                                                                                                                                                                                                                                                                                                                                                                             | Obutasasulwa nga oloopye<br>Non-remuneration for reporting                                                                                                      |       |      |               |
| 38.                                                                                                                                                                                                                                                                                                                                                                             | Obutaba nabiseera bya kuloopa buzibu obuva mu kukozeza obulezi<br>Lack of time to report ADR                                                                    |       |      |               |
| 39.                                                                                                                                                                                                                                                                                                                                                                             | Ensonga endhala etaloopebwa teyinza kukosa eiterekero ly'amawulire ag'obuzibu obuva mu kukozeza obulezi<br>A single unreported case may not affect ADR database |       |      |               |
| 40.                                                                                                                                                                                                                                                                                                                                                                             | Obukalubiriiivu okusalawo oba obuzibu okuva mu kukozeza obulezi                                                                                                 |       |      |               |

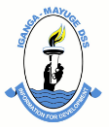

---

|                                                     |  |  |  |
|-----------------------------------------------------|--|--|--|
| bubairewo oba mbe                                   |  |  |  |
| Difficult to decide whether ADR has occurred or not |  |  |  |

---

Gabanaku niife kundhowooza dho edhiyinza okutumbula mu kuloopa obuzibu obuva mu kukozeza obulezi

Share with us some suggestions on the possible ways to improve the ADR reporting.

.....

.....

.....

.....

.....
