# Supplementary material for: The effect of community dialogues and sensitization on patient reporting of adverse events in rural Uganda: Uncontrolled before-after study
Source: PubMed Central journal article supplement (PMC6508596; doi:10.1371/journal.pone.0203721), 2019-05-09
Supplement: pone.0203721.s004.pdf [file pone.0203721.s004.pdf]

*Comparison of study participants' attitude towards the need to report adverse drug events before and after the CDS intervention.*

|                     | Yes               |                   |            |               | No             |                |              |                   | Don't know     |                |              |                   |
|---------------------|-------------------|-------------------|------------|---------------|----------------|----------------|--------------|-------------------|----------------|----------------|--------------|-------------------|
|                     | Before (%)        | After (%)         | % diff.    | 95% CI        | Before (%)     | After (%)      | % diff.      | 95% CI            | Before (%)     | After (%)      | % diff.      | 95% CI            |
| <b>Age category</b> |                   |                   |            |               |                |                |              |                   |                |                |              |                   |
| 15-24               | 144 (88.3)        | 133 (97.1)        | 10.0       | 4 to 16       | 12 (7.4)       | 4 (2.9)        | -60.8        | -88 to -33        | 7 (4.3)        | 0 (0)          | -100.0       | 0                 |
| 25-34               | 288 (94.7)        | 214 (95.5)        | 0.8        | -3 to 5       | 8 (2.6)        | 8 (3.6)        | 38.5         | 21 to 55          | 8 (2.6)        | 2 (0.9)        | -65.4        | -88 to -42        |
| 35-44               | 227 (93.4)        | 192 (96.0)        | 2.8        | -1 to 7       | 10 (4.1)       | 7 (3.5)        | -14.6        | -33 to 4          | 6 (2.5)        | 1 (0.5)        | -80.0        | -111 to -49       |
| 45-54               | 133 (91.7)        | 134 (97.8)        | 6.7        | 2 to 12       | 7 (4.8)        | 1 (0.7)        | -85.4        | -128 to -43       | 5 (3.4)        | 2 (1.5)        | -55.9        | -83 to -29        |
| 55-64               | 95 (90.5)         | 52 (96.3)         | 6.4        | -1 to 14      | 4 (3.8)        | 1 (1.9)        | -50.0        | -90 to -10        | 6 (5.7)        | 1 (1.9)        | -66.7        | -113 to -20       |
| 65+                 | 67 (90.5)         | 73 (98.6)         | 9.0        | 2 to 16       | 5 (6.8)        | 0 (0.0)        | -            | -                 | 2 (2.7)        | 1 (1.4)        | -48.2        | -                 |
| <b>Education</b>    |                   |                   |            |               |                | 0 (0.0)        |              |                   |                |                |              |                   |
| None                | 127 (86.4)        | 80 (88.9)         | 2.9        | -6 to 11      | 12 (8.2)       | 7 (7.8)        | -4.9         | -30 to 20         | 8 (5.4)        | 3 (3.3)        | -38.9        | -67 to -10        |
| Primary             | 488 (91.7)        | 410 (97.4)        | 6.2        | 3 to 9        | 22 (4.1)       | 7 (1.7)        | -58.5        | -74 to -43        | 22(4.1)        | 4 (1.0)        | -75.6        | -95 to -56        |
| Secondary           | 294 (94.8)        | 259 (97.7)        | 3.1        | 0 to 6        | 12 (3.9)       | 6 (2.3)        | -41.0        | -59 to 0          | 4 (1.3)        | 0 (0.0)        | -100.0       | 0                 |
| Tertiary            | 23 (100.0)        | 27 (100)          | 0.0        | -             | 0 (0.0)        | 0 (0.0)        | 0.0          | -                 | 0 (0.0)        | 0 (0.0)        | 0            | -                 |
| University          | 22 (100)          | 22 (95.7)         | -4.3       | -13 to 4      | 0 (0.0)        | 0 (0.0)        | 0.0          | -                 | 0 (0.0)        | 0 (0.0)        | 0            | -                 |
| <b>Religion</b>     |                   |                   |            |               |                |                |              |                   |                |                |              |                   |
| Anglican            | 225 (91.5)        | 248 (98.8)        | 8.0        | 4 to 12       | 12 (4.9)       | 2 (0.8)        | -83.7        | -114 to -53       | 9 (3.7)        | 1 (0.4)        | -89.2        | -126 to -52       |
| Roman Catholic      | 90 (96.8)         | 80 (97.6)         | 0.8        | -4 to 6       | 1 (1.1)        | 2 (2.4)        | 118.2        | -                 | 2 (2.2)        | 0 (0.0)        | -100.0       | -                 |
| Pentecostal         | 97 (94.2)         | 98 (95.1)         | 1.0        | -5 to 7       | 3 (2.9)        | 3 (2.9)        | 0.0          | -27 to 27         | 3 (2.9)        | 2 (1.9)        | -34.5        | -62 to -7         |
| Muslim              | 525 (91.6)        | 362 (95.3)        | 4.0        | 1 to 7        | 30 (5.2)       | 14 (3.7)       | -28.9        | -42 to -15        | 18 (3.1)       | 4 (1.1)        | -64.5        | -82 to -47        |
| Other               | 17 (89.5)         | 10 (100)          | 11.7       | -2 to 26      | 0 (0.0)        | 0 (0.0)        | 0.0          | -                 | 2 (10.5)       | 0 (0.0)        | 0            | -                 |
| <b>Overall</b>      | <b>954 (92.3)</b> | <b>798 (96.6)</b> | <b>4.6</b> | <b>3 to 7</b> | <b>0 (0.0)</b> | <b>0 (0.0)</b> | <b>-43.2</b> | <b>-53 to -33</b> | <b>33(3.3)</b> | <b>0 (0.0)</b> | <b>-75.8</b> | <b>-89 to -62</b> |
