# Supplementary material for: The effect of community dialogues and sensitization on patient reporting of adverse events in rural Uganda: Uncontrolled before-after study
Source: PubMed Central journal article supplement (PMC6508596; doi:10.1371/journal.pone.0203721), 2019-05-09
Supplement: pone.0203721.s005.pdf [file pone.0203721.s005.pdf]

*Comparison of respondents' having ever experienced ADEs by socio-demographic characteristics before and after CDS.*

|                  | Yes               |                |              |                   | No                |                   |              |                  | Don't know      |                |              |                  |
|------------------|-------------------|----------------|--------------|-------------------|-------------------|-------------------|--------------|------------------|-----------------|----------------|--------------|------------------|
|                  | Before (%)        | After (%)      | % age diff.  | 95% CI            | Before (%)        | After (%)         | % age diff.  | 95% CI           | Before (%)      | After (%)      | % age diff.  | 95% CI           |
| <b>Age group</b> |                   |                |              |                   |                   |                   |              |                  |                 |                |              |                  |
| 15-24            | 51 (31.3)         | 43 (43.0)      | 37.4         | 18 to 57          | 108 (66.3)        | 57 (57)           | -14.0        | -29 to 1         | 4 (2.5)         | 0 (0.0)        | -100.0       | -                |
| 25-34            | 109 (35.9)        | 61 (42.1)      | 17.3         | 2 to 32           | 183 (60.2)        | 84 (57.9)         | -3.8         | -16 to 9         | 12 (3.9)        | 0 (0.0)        | -100.0       | -                |
| 35-44            | 80 (32.9)         | 61 (47.3)      | 43.8         | 28 to 60          | 159 (65.4)        | 67 (51.9)         | -20.6        | -34 to -7        | 4 (1.6)         | 1 (0.8)        | -50.0        | -76 to -24       |
| 45-54            | 47 (32.4)         | 43 (46.7)      | 44.1         | 24 to 64          | 96 (66.2)         | 47 (51.1)         | -22.8        | -40 to -6        | 2 (1.4)         | 2 (2.2)        | 57.1         | 31 to 83         |
| 55-64            | 36 (34.3)         | 13 (35.1)      | 2.3          | -28 to 32         | 68 (64.8)         | 24 (64.9)         | 0.2          | -22 to 22        | 1 (1.0)         | 0 (0.0)        | -100.0       | -                |
| 65+              | 26 (35.1)         | 16 (36.4)      | 3.7          | -26 to 34         | 46 (62.2)         | 28 (63.6)         | 2.3          | -20 to 25        | 2 (2.7)         | 0 (0.0)        | -100.0       | -                |
| <b>Education</b> |                   |                |              |                   |                   |                   |              |                  |                 |                |              |                  |
| Primary          | 180 (33.8)        | 120 (42.4)     | 25.4         | 14 to 37          | 340 (63.9)        | 161 (56.9)        | -10.9        | -20 to -2        | 12 (2.3)        | 2 (0.7)        | -69.6        | -91 to -48       |
| Secondary        | 109 (35.2)        | 73 (40.1)      | 13.9         | 0 to 28           | 194 (62.6)        | 109 (59.9)        | -4.3         | -16 to 7         | 7 (2.3)         | 0 (0.0)        | -100.0       | -                |
| Tertiary         | 12 (52.2)         | 8 (40.0)       | -23.4        | -68 to 21         | 10 (43.5)         | 12 (60.0)         | -86.2        | -118 to -55      | 1 (4.3)         | 0 (0.0)        | -100.0       | -                |
| University       | 10 (45.5)         | 13 (65.0)      | 42.9         | 16 to 70          | 12 (54.5)         | 7 (35.0)          | -35.8        | -73 to 1         | 0 (0.0)         | 0 (0.0)        | 0.0          | -                |
| <b>Religion</b>  |                   |                |              |                   |                   |                   |              |                  |                 |                |              |                  |
| Anglican         | 89 (36.2)         | 66(38.6)       | 6.6          | -9 to 22          | 152 (61.8)        | 104 (60.8)        | -1.6         | -14 to 11        | 5 (2.0)         | 1 (0.6)        | -70.0        | -98 to -42       |
| Roman Catholic   | 23 (24.7)         | 20(41.7)       | 68.8         | 41 to 96          | 69 (74.2)         | 28 (58.3)         | -21.4        | -41 to -1        | 1 (1.1)         | 0 (0.0)        | -100.0       | -                |
| Pentecostal      | 45 (43.7)         | 32(46.4)       | 6.2          | -16 to 29         | 55 (53.4)         | 37 (53.6)         | 0.4          | -20 to 21        | 3 (2.9)         | 0 (0.0)        | -100.0       | -                |
| Muslim           | 189 (33)          | 115(45.6)      | 38.2         | 27 to 49          | 369 (64.4)        | 135 (53.6)        | -16.8        | -26 to -7        | 15 (2.6)        | 2 (0.8)        | -69.2        | -92 to -47       |
| Other            | 3 (15.8)          | 4(57.1)        | 261.4        | 195 to 328        | 15 (78.9)         | 3 (42.9)          | -45.6        | -98 to 7         | 1 (5.3)         | 0 (0.0)        | -100.0       | -                |
| <b>Overall</b>   | <b>349 (20.5)</b> | <b>237(44)</b> | <b>114.6</b> | <b>137 to 217</b> | <b>660 (63.8)</b> | <b>307 (29.7)</b> | <b>-53.5</b> | <b>-84 to -3</b> | <b>25 (2.4)</b> | <b>0 (0.0)</b> | <b>-87.9</b> | <b>-50 to 21</b> |
