# Supplementary material for: The effect of community dialogues and sensitization on patient reporting of adverse events in rural Uganda: Uncontrolled before-after study
Source: PubMed Central journal article supplement (PMC6508596; doi:10.1371/journal.pone.0203721), 2019-05-09
Supplement: pone.0203721.s006.pdf [file pone.0203721.s006.pdf]

*A comparison of the type of adverse events that the respondents would report before and after the CDS intervention*

|                                                                | Yes/Agree n (%) |            |        |           | No/Disagree n (%) |            |        |            | Don't know n (%) |           |        |            |
|----------------------------------------------------------------|-----------------|------------|--------|-----------|-------------------|------------|--------|------------|------------------|-----------|--------|------------|
|                                                                | Before (%)      | After (%)  | % Diff | 95% CI    | Before (%)        | After (%)  | % Diff | 95% CI     | Before (%)       | After (%) | % Diff | 95% CI     |
| Uncertain or suspected ADEs                                    | 807 (78.0)      | 721 (87.3) | 11.9   | 9 to 15   | 133 (12.9)        | 84 (10.2)  | -20.9  | -28 to -14 | 94 (9.1)         | 21 (2.5)  | -72.5  | -80 to -65 |
| Certain negative ADEs                                          | 697 (67.4)      | 634 (76.7) | 13.8   | 10 to 18  | 235 (22.7)        | 168 (20.3) | -10.6  | -17 to -4  | 102 (9.9)        | 24 (2.9)  | -70.7  | -78 to -63 |
| Serious reactions                                              | 797 (77.1)      | 756 (91.5) | 18.7   | 16 to 21  | 143 (13.8)        | 57 (6.9)   | -50.0  | -57 to -43 | 94 (9.1)         | 13 (1.6)  | -82.4  | -90 to -75 |
| Mild reactions                                                 | 728 (70.4)      | 573 (69.4) | -1.4   | -6 to 3   | 243 (23.5)        | 246 (29.8) | 26.8   | 20 to 33   | 63 (6.1)         | 7 (0.9)   | -85.3  | -93 to -78 |
| Reactions to drugs which have been on market for a long period | 718 (69.4)      | 649 (78.6) | 13.3   | 10 to 17  | 223 (21.6)        | 146 (17.7) | -18.1  | -24 to -12 | 93 (9.0)         | 31 (3.7)  | -58.9  | -65 to -52 |
| Reactions to newly introduced drugs                            | 770 (74.5)      | 706 (85.5) | 14.8   | 11 to 18  | 147 (14.2)        | 73 (8.8)   | -38.0  | -46 to -31 | 117 (11.3)       | 47 (5.7)  | -49.6  | -57 to -42 |
| Common or well-known reactions                                 | 639 (61.8)      | 483 (58.5) | -5.3   | -10 to -1 | 285 (27.6)        | 315 (38.1) | 38.0   | 32 to 44   | 110 (10.6)       | 28 (3.4)  | -67.9  | -75 to -61 |
| Unexpected reactions                                           | 737 (71.3)      | 683 (82.7) | 16     | 13 to 19  | 186 (18.0)        | 107 (12.9) | -28.3  | -35 to -21 | 111 (10.7)       | 36 (4.4)  | -58.9  | -66 to -52 |
| Possible interaction with other drugs                          | 660 (63.8)      | 582 (70.5) | 10.5   | 6 to 15   | 231 (22.3)        | 179 (21.7) | -2.7   | -9 to 4    | 143 (13.8)       | 65 (7.9)  | -42.8  | -50 to -35 |
| Reaction due to herbal medicine                                | 573 (55.4)      | 520 (62.9) | 13.5   | 9 to 18   | 370 (35.8)        | 279 (33.8) | -5.6   | -11 to 0.0 | 91 (8.8)         | 27 (3.3)  | -62.5  | -70 to -55 |
| Reactions due to herbal & conventional medicine taken together | 643 (62.2)      | 616 (74.6) | 19.9   | 16 to 24  | 301 (29.1)        | 179 (21.7) | -25.4  | -31 to -19 | 90 (8.7)         | 31 (3.7)  | -57.5  | -64 to -51 |

ADEs = adverse drug events
