# Supplementary material for: The effect of community dialogues and sensitization on patient reporting of adverse events in rural Uganda: Uncontrolled before-after study
Source: PubMed Central journal article supplement (PMC6508596; doi:10.1371/journal.pone.0203721), 2019-05-09
Supplement: pone.0203721.s007.pdf [file pone.0203721.s007.pdf]

**Fig 1: Comparison of options for reaching community members with ADE messages as perceived by respondents and healthcare professionals.**

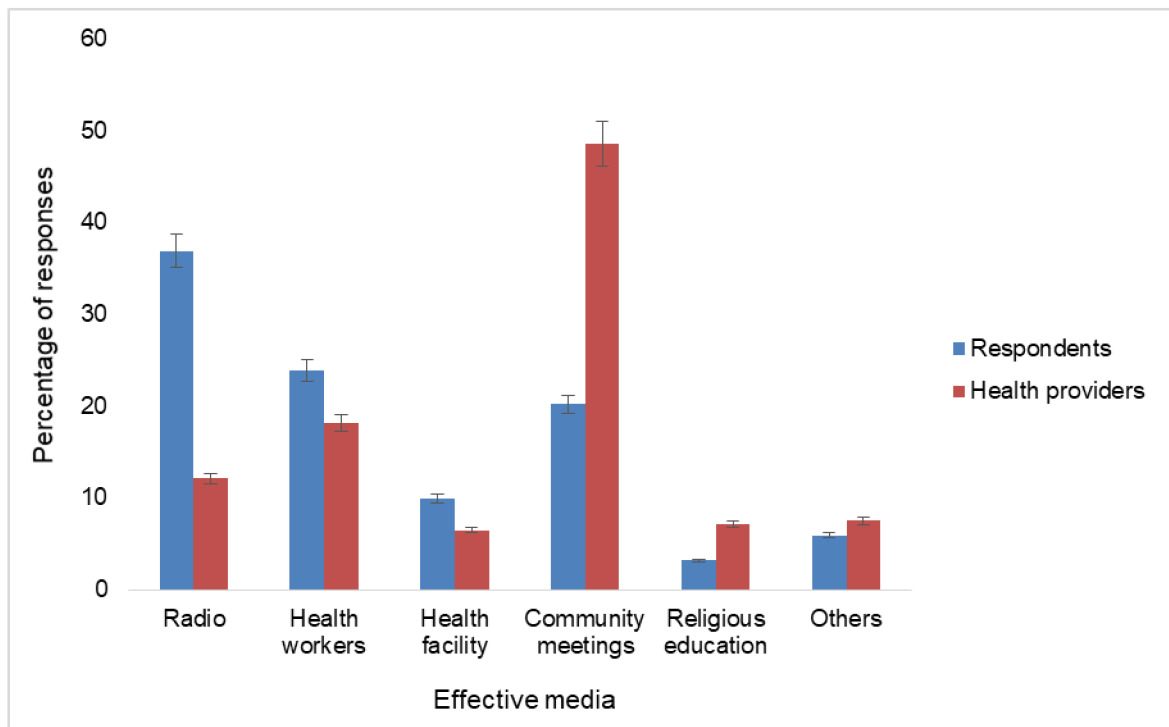

\*Error bars represent 95% confidence intervals of the percentage responses of community members
